# Supplementary material for: Physiologically Based Pharmacokinetic Modeling of Transdermal Selegiline and Its Metabolites for the Evaluation of Disposition Differences between Healthy and Special Populations
Source: PubMed Central journal article supplement (PMC7600566; doi:10.3390/pharmaceutics12100942), 2020-09-30
Supplement: pharmaceutics-12-00942-s001.pdf [file pharmaceutics-12-00942-s001.pdf]

# Supplementary Materials: Physiologically Based Pharmacokinetic Modeling of Transdermal Selegiline and Its Metabolites for the Evaluation of Disposition Differences between Healthy and Special Populations

Santosh Kumar Puttrevu \*, Sumit Arora, Sebastian Polak and Nikunj Kumar Patel

**Table S1.** Summary trial design and reported clinical studies used in the simulations.

| Population          | Age (Years) | Gender (M/F)                                   | Route       | Dosage Regimen            | Dose (mg)                                | Data Used For            | Reference                                              |
|---------------------|-------------|------------------------------------------------|-------------|---------------------------|------------------------------------------|--------------------------|--------------------------------------------------------|
| Healthy             | 18-45       | 13M                                            | IV infusion | Single dose for 24 hr     | 8.37                                     | Development/optimization | Azzaro, Ziemniak et al. 2007                           |
| Healthy             | 18-45       | 13M                                            | Transdermal | Single dose for 24 hr     | 20 per 20 cm <sup>2</sup>                | Development/optimization | Azzaro, Ziemniak et al. 2007                           |
| Healthy             | 20-26       | 6M                                             | Transdermal | Single dose for 24 hr     | 18.3 per 10 cm <sup>2</sup>              | Verification             | Rohatagi, Barrett et al. 1997                          |
| Healthy             | 19-41       | 6M/4F                                          | Transdermal | Single dose for 168 hr    | 20 per 20 cm <sup>2</sup>                | Verification             | NDA:21-336/21-708 Clinical and Biopharmaceutics review |
| Elderly             | 61-76       | 6M/6F                                          | Transdermal | Single dose for 24 hr     | 18.3 per 10 cm <sup>2</sup>              | Verification             | Barrett, Hochadel et al. 1996                          |
| Elderly             | 65-78       | 18M                                            | Transdermal | Multiple dose for 10 days | 7.5 per 5 cm <sup>2</sup> for every 24 h | Verification             | NDA:21-336/21-708 Clinical and Biopharmaceutics review |
| Elderly             | 65-78       | 18M                                            | Transdermal | Multiple dose for 10 days | 20 per 20 cm <sup>2</sup> for every 24 h | Verification             | NDA:21-336/21-708 Clinical and Biopharmaceutics review |
| Elderly             | 65-78       | 18M                                            | Transdermal | Multiple dose for 10 days | 30 per 20 cm <sup>2</sup> for every 24 h | Verification             | NDA:21-336/21-708 Clinical and Biopharmaceutics review |
| Renal impairment*   | 46-80       | 6M/6F with 4 each in Mild, Moderate and Severe | Transdermal | Single dose for 24 hr     | 20 per 20 cm <sup>2</sup>                | Prediction               | NDA:21-336/21-708 Clinical and Biopharmaceutics review |
| Hepatic impairment* | 41-54       | 6M/2F With 7 moderate and 1 Mild               | Transdermal | Single dose for 24 hr     | 20 per 20 cm <sup>2</sup>                | Prediction               | NDA:21-336/21-708 Clinical and Biopharmaceutics review |

\*For renal and hepatic impaired subjects the number of subjects (120 subjects) used in the simulations were different from the observed subjects since they were underpowered.

**Table S2.** CYP enzyme abundance and frequency of metabolizers in the virtual populations.

| CYP abundance in healthy adult and adolescent populations |      |      |      |      |      |      |      |      |
|-----------------------------------------------------------|------|------|------|------|------|------|------|------|
| Absolute Abundance (pmol/mg protein)                      |      |      |      |      |      |      |      |      |
| CYP Enzyme                                                | EM   |      | PM   |      | IM   |      | UM   |      |
|                                                           | Mean | % CV | Mean | % CV | Mean | % CV | Mean | % CV |
| 1A2                                                       | 52   | 67   | 0    | 0    | 0    | 0    | 0    | 0    |
| 2A6                                                       | 20   | 173  | 0    | 0    | 0    | 0    | 0    | 0    |
| 2B6                                                       | 17   | 122  | 6    | 200  | 0    | 0    | 0    | 0    |
| 2C8                                                       | 24   | 81   | 0    | 0    | 0    | 0    | 0    | 0    |
| 2C9                                                       | 73   | 54   | 29   | 73   | 0    | 0    | 0    | 0    |
| 2C18                                                      | 1    | 106  | 0    | 0    | 0    | 0    | 0    | 0    |
| 2C19                                                      | 14   | 106  | 0    | 0    | 0    | 0    | 0    | 0    |
| 2D6                                                       | 8    | 61   | 0    | 0    | 0    | 0    | 16   | 61   |
| 2E1                                                       | 61   | 61   | 0    | 0    | 0    | 0    | 0    | 0    |
| 2J2                                                       | 1.2  | 175  | 0    | 0    | 0    | 0    | 0    | 0    |
| 3A4                                                       | 137  | 41   | 0    | 0    | 0    | 0    | 0    | 0    |

  

| CYP abundance in the moderate renally impaired population |      |      |      |      |      |      |      |      |
|-----------------------------------------------------------|------|------|------|------|------|------|------|------|
| Absolute Abundance (pmol/mg protein)                      |      |      |      |      |      |      |      |      |
| CYP Enzyme                                                | EM   |      | PM   |      | IM   |      | UM   |      |
|                                                           | Mean | % CV | Mean | % CV | Mean | % CV | Mean | % CV |
| 1A2                                                       | 28.4 | 67   | 0    | 0    | 0    | 0    | 0    | 0    |
| 2A6                                                       | 10.9 | 173  | 0    | 0    | 0    | 0    | 0    | 0    |
| 2B6                                                       | 9.3  | 122  | 3.3  | 200  | 0    | 0    | 0    | 0    |
| 2C8                                                       | 13.1 | 81   | 0    | 0    | 0    | 0    | 0    | 0    |
| 2C9                                                       | 39.9 | 54   | 15.9 | 73   | 0    | 0    | 0    | 0    |
| 2C18                                                      | 0.68 | 106  | 0    | 0    | 0    | 0    | 0    | 0    |
| 2C19                                                      | 7.6  | 106  | 0    | 0    | 0    | 0    | 0    | 0    |
| 2D6                                                       | 4.6  | 61   | 0    | 0    | 0    | 0    | 9.2  | 61   |
| 2E1                                                       | 37.3 | 61   | 0    | 0    | 0    | 0    | 0    | 0    |
| 2J2                                                       | 0.87 | 175  | 0    | 0    | 0    | 0    | 0    | 0    |
| 3A4                                                       | 95.2 | 41   | 0    | 0    | 0    | 0    | 0    | 0    |

  

| CYP abundance in the severe renally impaired population |      |      |      |      |      |      |      |      |
|---------------------------------------------------------|------|------|------|------|------|------|------|------|
| Absolute Abundance (pmol/mg protein)                    |      |      |      |      |      |      |      |      |
| CYP Enzyme                                              | EM   |      | PM   |      | IM   |      | UM   |      |
|                                                         | Mean | % CV | Mean | % CV | Mean | % CV | Mean | % CV |
| 1A2                                                     | 27.4 | 67   | 0    | 0    | 0    | 0    | 0    | 0    |
| 2A6                                                     | 9.4  | 173  | 0    | 0    | 0    | 0    | 0    | 0    |
| 2B6                                                     | 8    | 122  | 2.8  | 200  | 0    | 0    | 0    | 0    |
| 2C8                                                     | 11.3 | 81   | 0    | 0    | 0    | 0    | 0    | 0    |
| 2C9                                                     | 34.5 | 54   | 13.7 | 73   | 0    | 0    | 0    | 0    |
| 2C18                                                    | 0.57 | 106  | 0    | 0    | 0    | 0    | 0    | 0    |
| 2C19                                                    | 6    | 106  | 0    | 0    | 0    | 0    | 0    | 0    |
| 2D6                                                     | 3.6  | 61   | 0    | 0    | 0    | 0    | 7.2  | 61   |
| 2E1                                                     | 25.8 | 61   | 0    | 0    | 0    | 0    | 0    | 0    |
| 2J2                                                     | 0.67 | 175  | 0    | 0    | 0    | 0    | 0    | 0    |
| 3A4                                                     | 87.3 | 41   | 0    | 0    | 0    | 0    | 0    | 0    |

CYP abundance in the hepatic cirrhosis CP-B population

| CYP Enzyme | Absolute Abundance (pmol/mg protein) |      |      |      |      |      |      |      |
|------------|--------------------------------------|------|------|------|------|------|------|------|
|            | EM                                   |      | PM   |      | IM   |      | UM   |      |
|            | Mean                                 | % CV | Mean | % CV | Mean | % CV | Mean | % CV |
| 1A2        | 13.6                                 | 67   | 0    | 0    | 0    | 0    | 0    | 0    |
| 2A6        | 12.3                                 | 173  | 0    | 0    | 0    | 0    | 0    | 0    |
| 2B6        | 15.3                                 | 122  | 5.4  | 200  | 0    | 0    | 0    | 0    |
| 2C8        | 12.5                                 | 81   | 0    | 0    | 0    | 0    | 0    | 0    |
| 2C9        | 38                                   | 54   | 13.7 | 73   | 0    | 0    | 0    | 0    |
| 2C18       | 0.26                                 | 106  | 0    | 0    | 0    | 0    | 0    | 0    |
| 2C19       | 3.6                                  | 106  | 0    | 0    | 0    | 0    | 0    | 0    |
| 2D6        | 2.6                                  | 61   | 0    | 0    | 0    | 0    | 5.2  | 61   |
| 2E1        | 29.3                                 | 61   | 0    | 0    | 0    | 0    | 0    | 0    |
| 2J2        | 1.2                                  | 175  | 0    | 0    | 0    | 0    | 0    | 0    |
| 3A4        | 56                                   | 41   | 0    | 0    | 0    | 0    | 0    | 0    |

CYP abundance in the hepatic cirrhosis CP-C population

| CYP Enzyme      | Absolute Abundance (pmol/mg protein) |      |      |      |      |      |      |      |
|-----------------|--------------------------------------|------|------|------|------|------|------|------|
|                 | EM                                   |      | PM   |      | IM   |      | UM   |      |
|                 | Mean                                 | % CV | Mean | % CV | Mean | % CV | Mean | % CV |
| Pmol/mg protein |                                      |      |      |      |      |      |      |      |
| 1A2             | 6.14                                 | 67   | 0    | 0    | 0    | 0    | 0    | 0    |
| 2A6             | 6.43                                 | 173  | 0    | 0    | 0    | 0    | 0    | 0    |
| 2B6             | 13.6                                 | 122  | 4.8  | 200  | 0    | 0    | 0    | 0    |
| 2C8             | 7.82                                 | 81   | 0    | 0    | 0    | 0    | 0    | 0    |
| 2C9             | 24.09                                | 54   | 9.6  | 73   | 0    | 0    | 0    | 0    |
| 2C18            | 0.13                                 | 106  | 0    | 0    | 0    | 0    | 0    | 0    |
| 2C19            | 1.75                                 | 106  | 0    | 0    | 0    | 0    | 0    | 0    |
| 2D6             | 0.84                                 | 61   | 0    | 0    | 0    | 0    | 1.68 | 61   |
| 2E1             | 6.72                                 | 61   | 0    | 0    | 0    | 0    | 0    | 0    |
| 2J2             | 1.2                                  | 175  | 0    | 0    | 0    | 0    | 0    | 0    |
| 3A4             | 31                                   | 41   | 0    | 0    | 0    | 0    | 0    | 0    |

Frequency of metabolizers

| CYP Enzyme | EM    | PM     | IM | UM    |
|------------|-------|--------|----|-------|
| 1A2        | 1     | 0      | 0  | 0     |
| 2A6        | 1     | 0      | 0  | 0     |
| 2B6        | 0.89  | 0.11   | 0  | 0     |
| 2C8        | 1     | 0      | 0  | 0     |
| 2C9        | 0.94  | 0.06   | 0  | 0     |
| 2C18       | 1     | 0      | 0  | 0     |
| 2C19       | 0.976 | 0.024  | 0  | 9     |
| 2D6        | 0.865 | 0.0862 | 0  | 0.053 |
| 2E1        | 1     | 0      | 0  | 0     |
| 2J2        | 1     | 0      | 0  | 0     |
| 3A4        | 1     | 0      | 0  | 0     |

Table S3. Optimization of empirical release rate from the transdermal patch.

| Type of Release                        | Best Fitted Estimate by Parameter Estimation | AIC    | RMSE       |
|----------------------------------------|----------------------------------------------|--------|------------|
| Zero order (mg/h)                      | 0.55                                         | 113.31 | 2.562E+002 |
| First order (1/h)                      | 0.04                                         | 90.49  | 1.256E+002 |
| Higuchi release (mg/h <sup>1/2</sup> ) | 3.23                                         | 96.60  | 1.520E+002 |

AIC: Akaike information criterion; RMSE: Root mean square error.

**Figure S1.** Empirical release rate optimization results of the transdermal patch.

Sensitivity analysis

Zero order

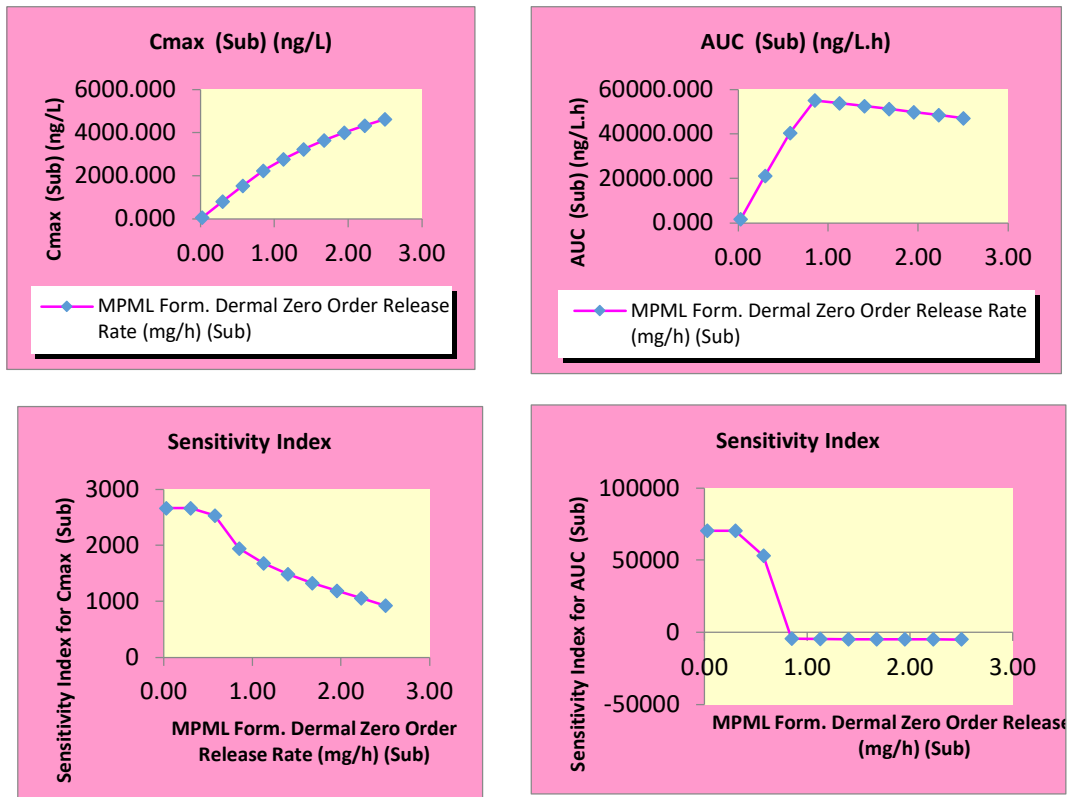

First order

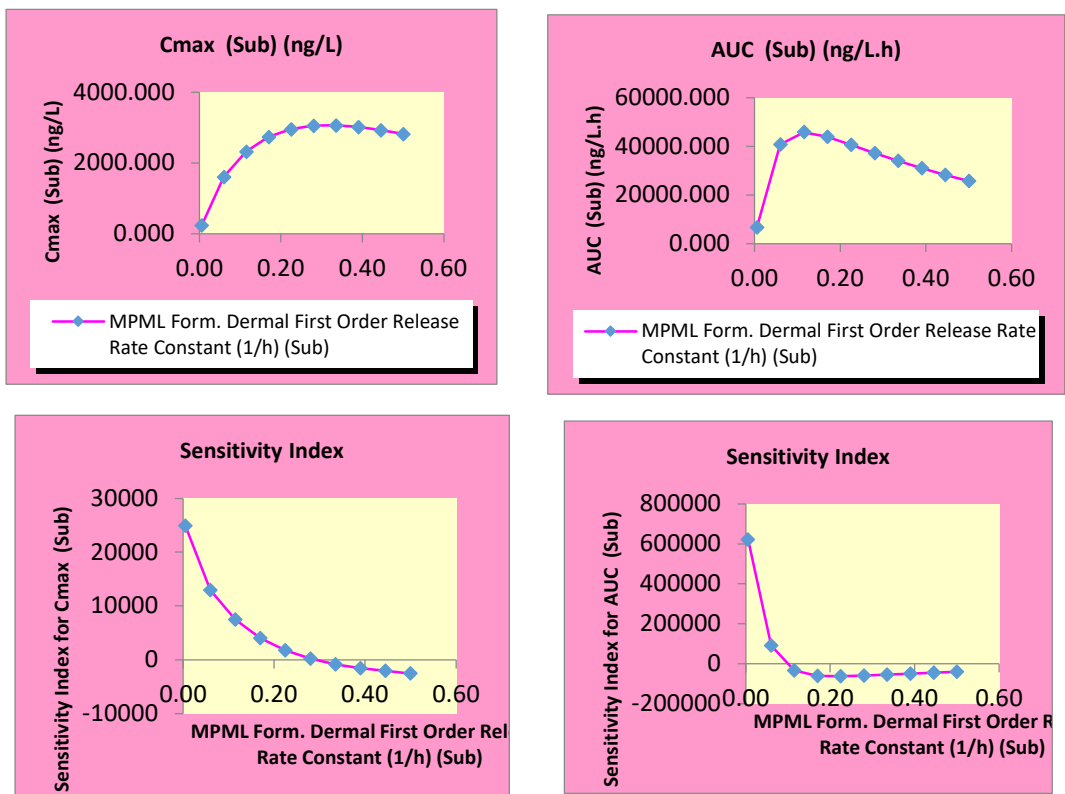

Higuchi release.

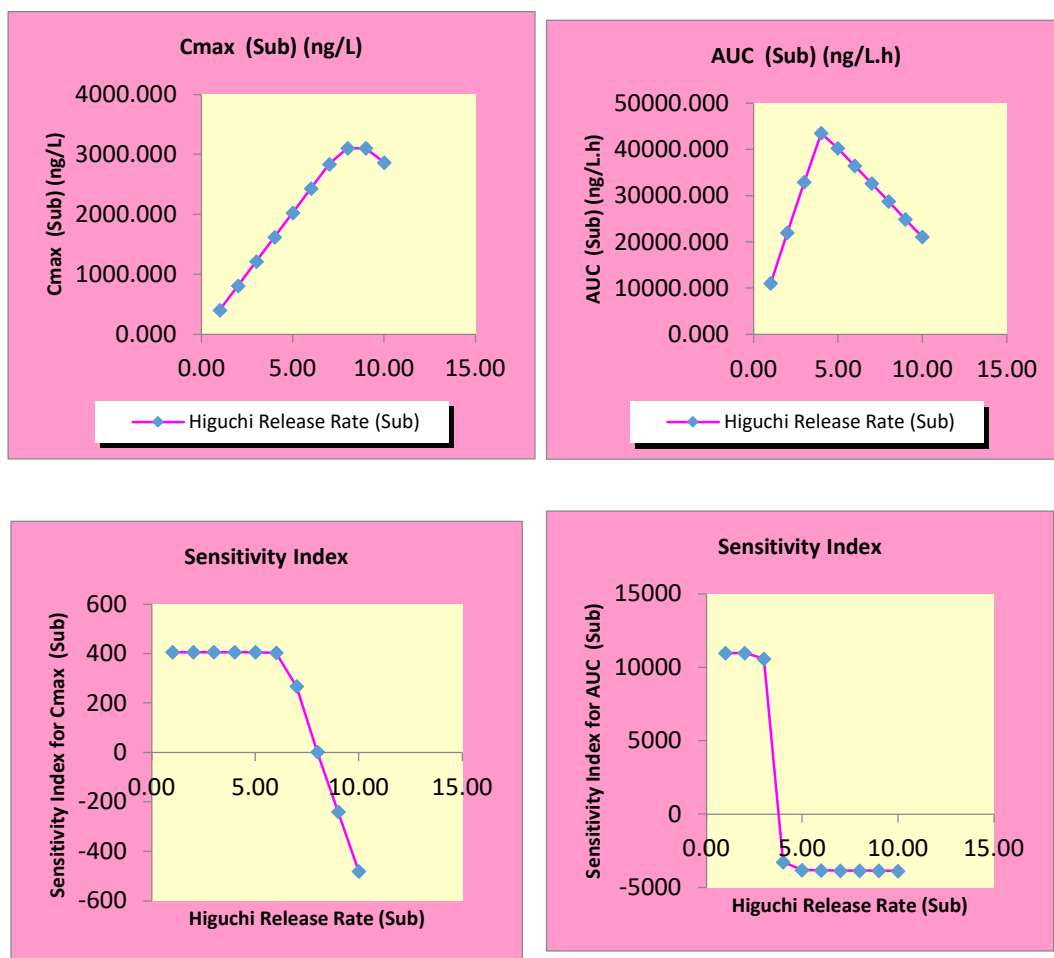

Parameter estimation

Zero order

| Summary                                                                           |                        |                        |         |        |              |        |            |
|-----------------------------------------------------------------------------------|------------------------|------------------------|---------|--------|--------------|--------|------------|
| Simulation Details                                                                |                        |                        |         |        |              |        |            |
| No of Evaluations                                                                 | 107.00                 |                        |         |        |              |        |            |
| PE Duration                                                                       | 20 minutes, 43 seconds |                        |         |        |              |        |            |
| Model Diagnostics                                                                 |                        |                        |         |        |              |        |            |
| Subject                                                                           | Residual Variance(DV1) | Residual Variance(DV2) | OFV     | AIC    | AICc         | BIC    | RMSE       |
| Mean-1                                                                            | 70012.09               | -                      | 1050.18 | 113.31 | 113.59       | 114.08 | 2.562E+002 |
| Parameter Estimates: MPML Form. Dermal Zero Order Release Rate (mg/h) (Sub) (Sub) |                        |                        |         |        |              |        |            |
| Subject                                                                           | Estimate               | 95% lower CI           |         |        | 95% upper CI |        |            |
| Mean-1                                                                            | 0.49                   | 0.42                   |         |        | 0.55         |        |            |

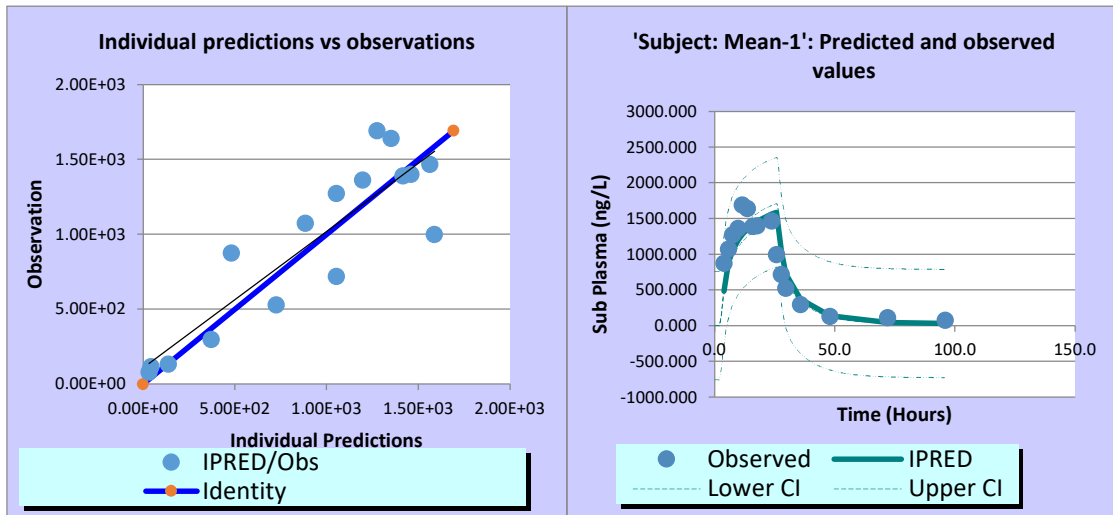

First order

**Summary**

**Simulation Details**

No of Evaluations: 107.00  
 PE Duration: 21 minutes, 21 seconds

**Model Diagnostics**

| Subject | Residual Variance(DV1) | Residual Variance(DV2) | OFV   | AIC  | AICc | BIC  | RMSE      |
|---------|------------------------|------------------------|-------|------|------|------|-----------|
| Mean-1  | 16824.57               | -                      | 252.3 | 90.4 | 90.7 | 91.2 | 1.256E+00 |
|         |                        |                        | 7     | 9    | 8    | 7    | 2         |

**Parameter Estimates: MPML Form. Dermal First Order Release Rate Constant (1/h) (Sub) (Sub)**

| Subject | Estimate | 95% lower CI | 95% upper CI |
|---------|----------|--------------|--------------|
| Mean-1  | 0.04     | 0.03         | 0.04         |

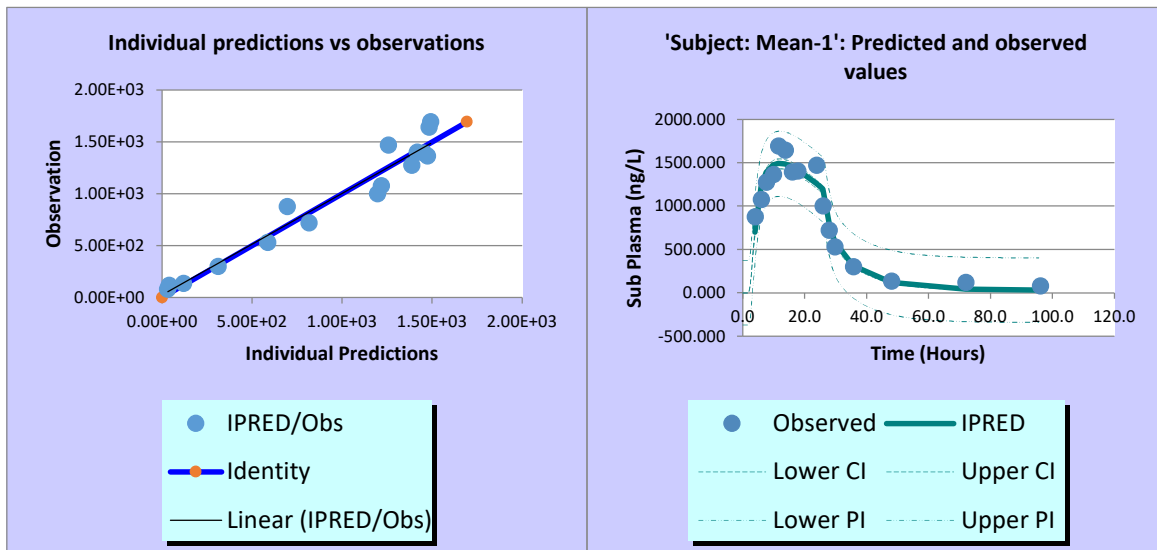

## Higuchi release

| Summary                                               |                        |                        |              |      |      |      |           |
|-------------------------------------------------------|------------------------|------------------------|--------------|------|------|------|-----------|
| Simulation Details                                    |                        |                        |              |      |      |      |           |
| No of Evaluations                                     | 109.00                 |                        |              |      |      |      |           |
| PE Duration                                           | 20 min, 23 S           |                        |              |      |      |      |           |
| Model Diagnostics                                     |                        |                        |              |      |      |      |           |
| Subject                                               | Residual Variance(DV1) | Residual Variance(DV2) | OFV          | AIC  | AICc | BIC  | RMSE      |
| Mean-1                                                | 2,4634.87              | -                      | 369.5        | 96.6 | 96.8 | 97.3 | 1.520E+00 |
|                                                       |                        |                        | 2            | 0    | 8    | 7    | 2         |
| Parameter Estimates: Higuchi Release Rate (Sub) (Sub) |                        |                        |              |      |      |      |           |
| Subject                                               | Estimate               | 95% lower CI           | 95% upper CI |      |      |      |           |
| Mean-1                                                | 3.00                   | 2.77                   | 3.23         |      |      |      |           |

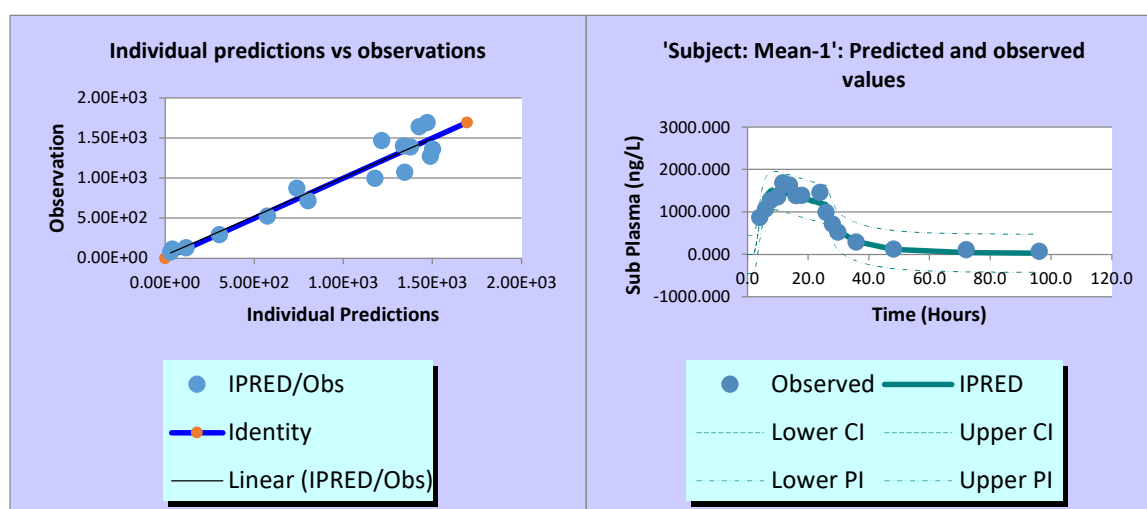

**Table S4.** Predicted and observed pharmacokinetic parameters of selegiline and its metabolites in elderly males and females, study reported by Barret *et al* 1996.

| Males    |           |       |           |       |           |       |          |       |
|----------|-----------|-------|-----------|-------|-----------|-------|----------|-------|
| Compound | Predicted | %     | Observed  | %     | Predicted | %     | Observed | %     |
|          | $C_{max}$ | CV    | $C_{max}$ | CV    | AUC       | CV    | AUC      | CV    |
| SEL      | 1.418     | 14.50 | 2.1       | 57.14 | 40.78     | 14.42 | 55.8     | 46.06 |
| MAP      | 1.496     | 26.72 | 2.6       | 26.92 | 77.85     | 37.01 | 124      | 29.52 |
| DMS      | 0.455     | 25.84 | 1         | 40.00 | 19.46     | 31.79 | 34.9     | 46.42 |
| AMP      | 1.045     | 31.35 | 1         | 40.00 | 48.97     | 28.31 | 45.1     | 38.14 |
| Females  |           |       |           |       |           |       |          |       |
| Compound | Predicted | %     | Observed  | %     | Predicted | %     | Observed | %     |
|          | $C_{max}$ | CV    | $C_{max}$ | CV    | AUC       | CV    | AUC      | CV    |
| SEL      | 1.62      | 11.92 | 2.1       | 42.86 | 44.05     | 11.27 | 62.1     | 40.26 |
| MAP      | 2.05      | 28.18 | 2.8       | 50.00 | 104.47    | 34.76 | 151      | 58.61 |
| DMS      | 0.64      | 25.86 | 0.7       | 57.14 | 25.10     | 29.67 | 26.8     | 43.66 |
| AMP      | 1.13      | 19.62 | 1.1       | 63.64 | 48.03     | 18.46 | 56.5     | 61.24 |

$C_{max}$ : ng/mL and AUC: h\*ng/ml

**Table S5.** Metabolite formation clearance values (L/h) from SEL for each CYP enzyme in different populations.

| CYP Isoform | Healthy |         | MRI     |        | SRI     |        | CP-B    |        | CP-C   |        | Adolescents |         |
|-------------|---------|---------|---------|--------|---------|--------|---------|--------|--------|--------|-------------|---------|
|             | MAP     | DMS     | MAP     | DMS    | MAP     | DMS    | MAP     | DMS    | MAP    | DMS    | MAP         | DMS     |
| 1A2         | 3085.61 | 1210.53 | 1095.10 | 429.62 | 1068.82 | 419.31 | 426.87  | 167.47 | 165.58 | 64.96  | 2974.91     | 1167.10 |
| 2A6         | 1189.49 | 291.19  | 448.99  | 109.91 | 392.13  | 96.00  | 359.21  | 87.94  | 161.33 | 39.50  | 936.75      | 229.32  |
| 2B6         | 360.93  | 109.07  | 142.33  | 43.01  | 122.46  | 37.01  | 221.35  | 66.89  | 169.05 | 51.09  | 260.85      | 78.83   |
| 2C9         |         | 49.30   |         | 16.49  |         | 14.39  |         | 13.09  |        | 7.13   |             | 33.87   |
| 2C18        | 71.78   | 47.38   | 35.08   | 23.15  | 27.84   | 18.37  | 11.27   | 7.44   | 4.84   | 3.20   | 60.37       | 39.84   |
| 2C19        | 8229.71 | 895.85  | 3171.50 | 345.23 | 2526.30 | 275.00 | 1423.10 | 154.91 | 594.35 | 64.70  | 6803.43     | 740.59  |
| 2D6         | 520.64  | 438.86  | 206.58  | 174.13 | 160.84  | 135.58 | 98.05   | 82.65  | 27.22  | 22.94  | 392.63      | 392.63  |
| 2E1         |         | 2419.17 |         | 932.54 |         | 642.40 |         | 652.25 |        | 128.53 |             | 1636.30 |
| 3A4         | 4303.39 | 995.03  | 2033.30 | 470.14 | 1855.64 | 429.06 | 1032.82 | 238.81 | 491.21 | 113.58 | 3623.96     | 837.93  |

**Note:** Predicted mean clearance values (L/hr) in different populations.

**Figure S2.** Absolute abundance values (pmol/mg) in individuals of different virtual populations.

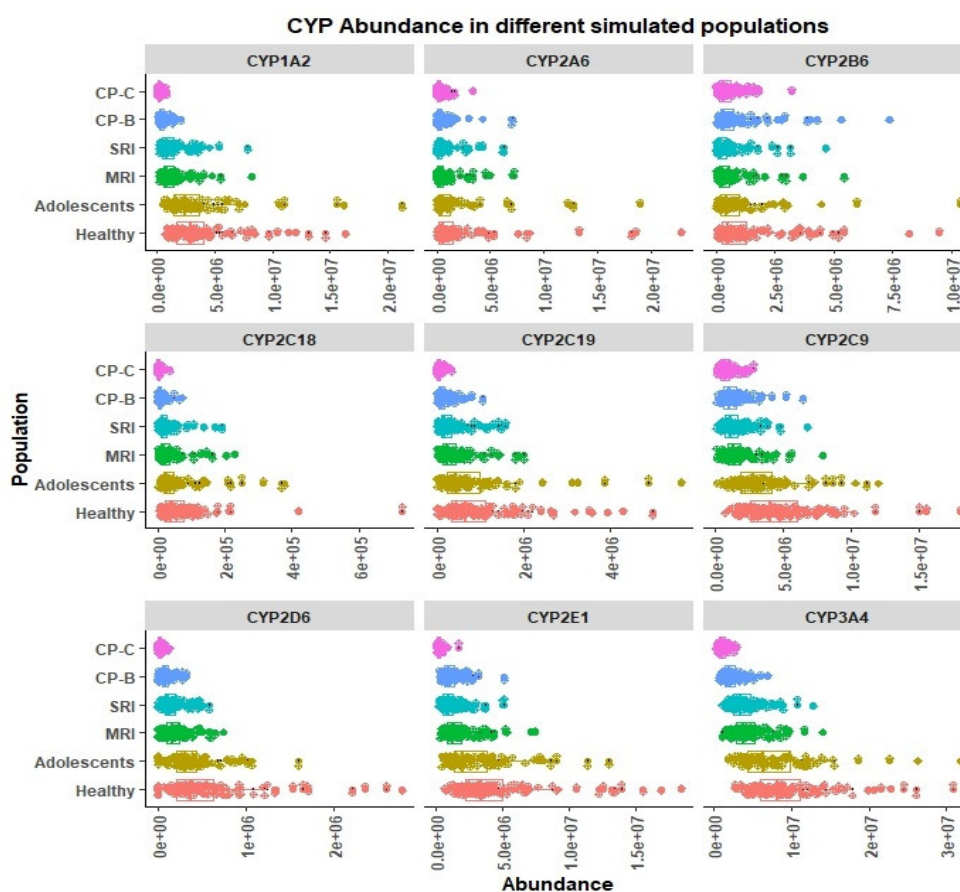



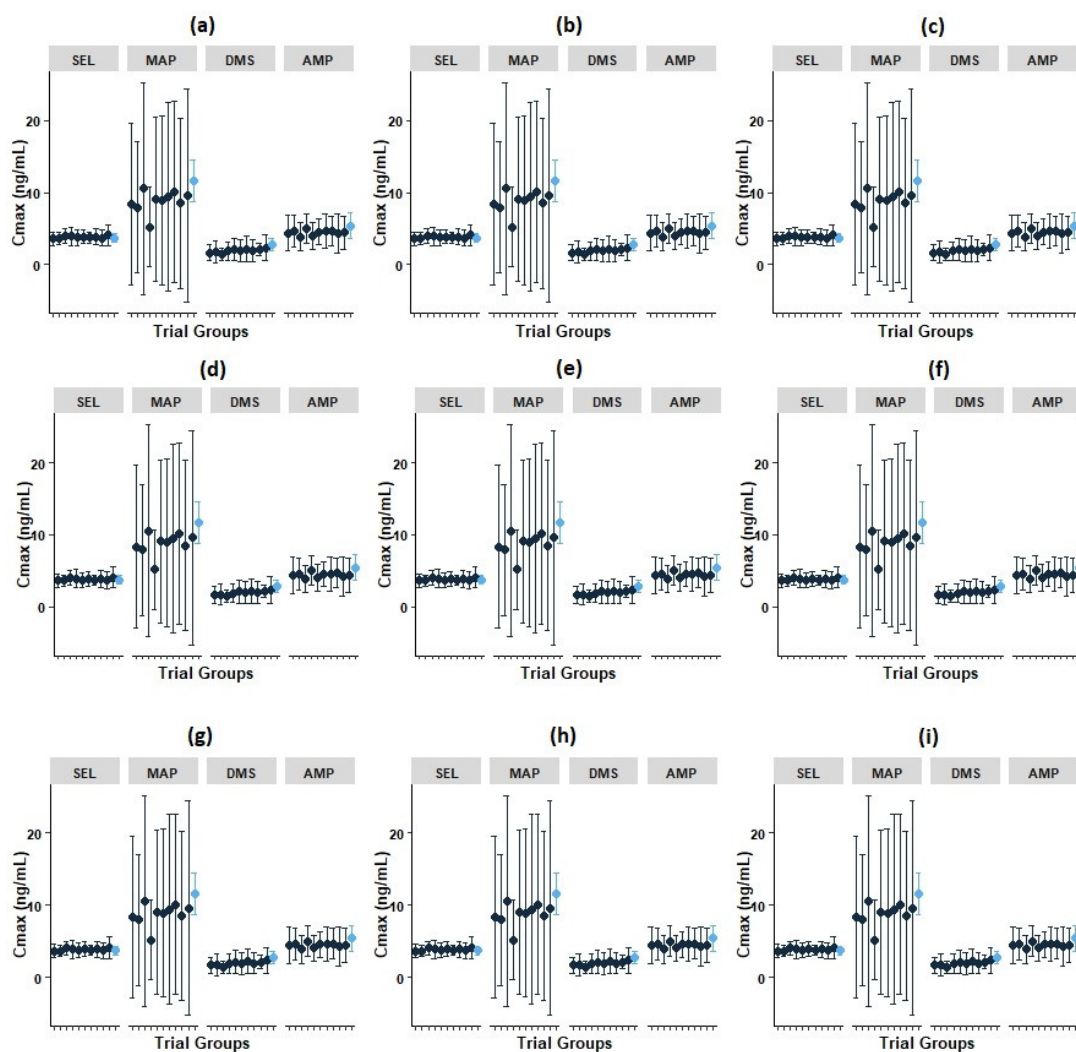

**Figure S3A.** The plot represents the predicted mean $\pm$ standard of maximum plasma concentration ( $C_{max}$ ) of 10 virtual trials and clinically observed mean $\pm$ standard deviation. The observed data is represented in sky blue colour and the predicted data is represented in dark blue colour. The compounds SEL: Selegiline, MAP: Methamphetamine, DMS: Desmethyl Selegiline and AMP: Amphetamine are shown as faceted plots. (a) Intravenous infusion at 8.37 mg/kg for 24 hours, (b) Single dose Transdermal pharmacokinetics in healthy male adults at 20 mg/20 cm<sup>2</sup> for 24 hours, (c) Single dose Transdermal pharmacokinetics in healthy male and female adults at 20 mg/20 cm<sup>2</sup> for 168 hours, (d) Single dose Transdermal pharmacokinetics in six male healthy adults at 18.3 mg/10 cm<sup>2</sup> for 24 hours, (e) Single dose Transdermal pharmacokinetics in six healthy elderly males at 18.3 mg/10 cm<sup>2</sup> for 24 hours, (f) Single dose Transdermal pharmacokinetics in six healthy elderly males and females at 18.3 mg/10 cm<sup>2</sup> for 24 hours, (g) Multiple dose Transdermal pharmacokinetics in healthy elderly subjects at 7.5 mg/5 cm<sup>2</sup>/24 hours for 10 days, (h) Multiple dose Transdermal pharmacokinetics in healthy elderly subjects at 20 mg/20 cm<sup>2</sup>/24 hours for 10 days, (i) Multiple dose Transdermal pharmacokinetics in healthy elderly subjects at 30 mg/20 cm<sup>2</sup>/24 hours for 10 days.

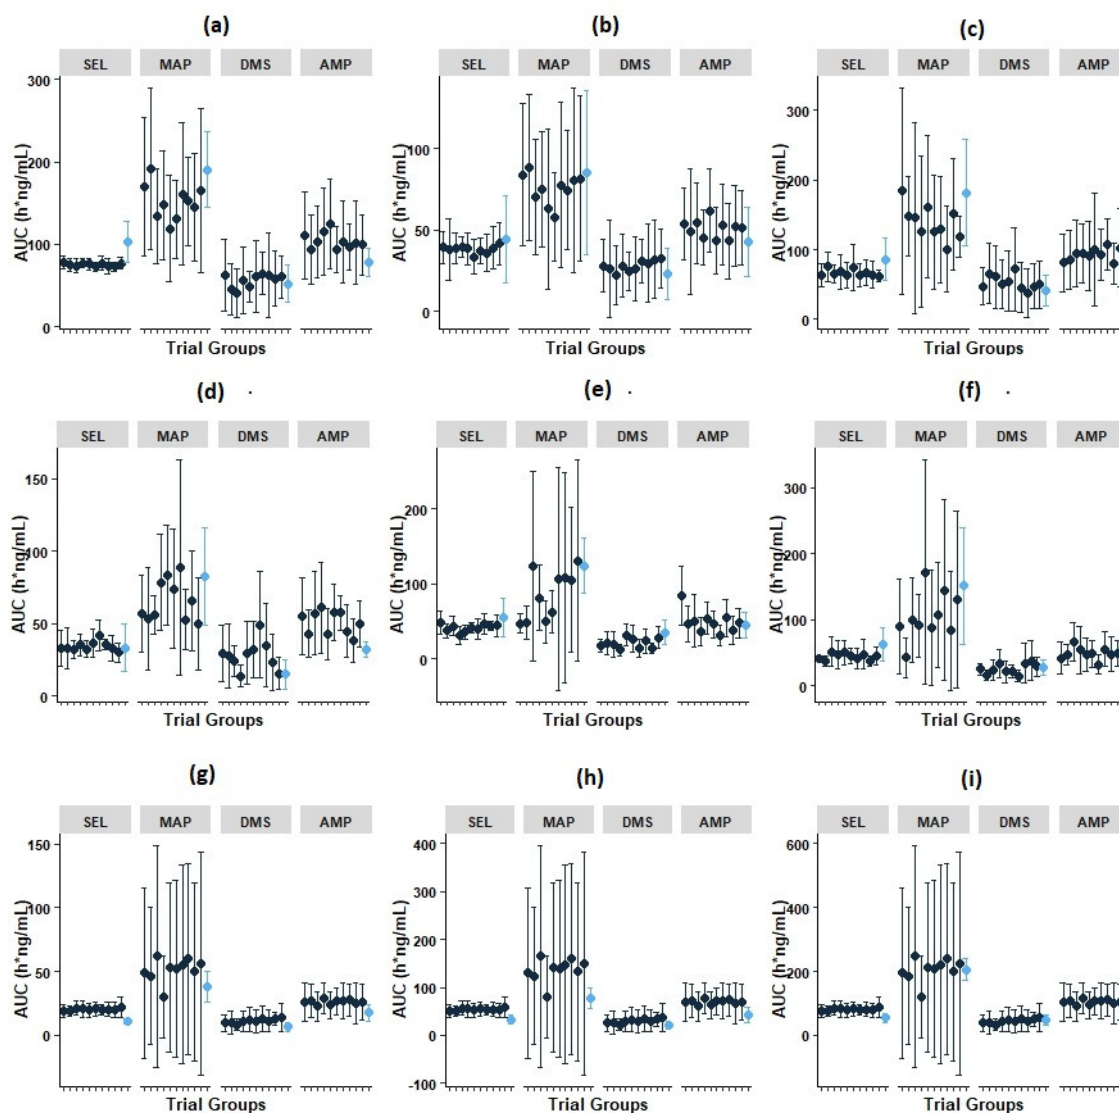

**Figure S3B.** The plot represents the predicted mean $\pm$ standard of Area under the curve ( $\text{AUC}_{0-t}$ ) of 10 virtual trials and clinically observed mean $\pm$ standard deviation. The observed data is represented in sky blue colour and the predicted data is represented in dark blue colour. The compounds SEL: Selegiline, MAP: Methamphetamine, DMS: Desmethyl Selegiline and AMP: Amphetamine are shown as faceted plots. (a) Intravenous infusion at 8.37 mg/kg for 24 hours, (b) Single dose Transdermal pharmacokinetics in healthy male adults at 20 mg/20  $\text{cm}^2$  for 24 hours, (c) Single dose Transdermal pharmacokinetics in healthy male and female adults at 20 mg/20  $\text{cm}^2$  for 168 hours, (d) Single dose Transdermal pharmacokinetics in six male healthy adults at 18.3 mg/10  $\text{cm}^2$  for 24 hours, (e) Single dose Transdermal pharmacokinetics in six healthy elderly males at 18.3 mg/10  $\text{cm}^2$  for 24 hours, (f) Single dose Transdermal pharmacokinetics in six healthy elderly males and females at 18.3 mg/10  $\text{cm}^2$  for 24 hours, (g) Multiple dose Transdermal pharmacokinetics in healthy elderly subjects at 7.5 mg/5  $\text{cm}^2/24$  hours for 10 days, (h) Multiple dose Transdermal pharmacokinetics in healthy elderly subjects at 20 mg/20  $\text{cm}^2/24$  hours for 10 days, (i) Multiple dose Transdermal pharmacokinetics in healthy elderly subjects at 30 mg/20  $\text{cm}^2/24$  hours for 10 days.
